# Supplementary material for: Quantifying the Sustainability of Water Availability for the Water‐Food‐Energy‐Ecosystem Nexus in the Niger River Basin
Source: PubMed Central journal article supplement (PMC6473704; doi:10.1029/2018ef000923), 2018-09-22
Supplement: EFT2-6-1292-s002.pdf [file EFT2-6-1292-s002.pdf]

## **Quantifying the Sustainability of Water Availability for the Water-Food-Energy-Ecosystem Nexus in the Niger River Basin**

Jie Yang<sup>1,2</sup>, Y. C. Ethan Yang<sup>2\*</sup>, Hassaan F. Khan<sup>3</sup>, Hua Xie<sup>4</sup>, Claudia Ringler<sup>4</sup>, Andrew Ogilvie<sup>5</sup>, Ousmane Seidou<sup>6,7</sup>, Abdouramane Gado Djibo<sup>8</sup>, Frank van Weert<sup>9</sup>, and Rebecca Tharme<sup>10</sup>

<sup>1</sup>. State Key Laboratory of Eco-hydraulics in Northwest Arid Region of China (Xi'an University of Technology), Xi'an, 710048

<sup>2</sup>. Department of Civil and Environmental Engineering, Lehigh University, Bethlehem, PA 18015, USA

<sup>3</sup>. Department of Civil and Environmental Engineering, University of Massachusetts, Amherst, MA 01003, USA

<sup>4</sup>. International Food Policy Research Institute, Washington, DC, 20006, USA

<sup>5</sup>. IRD UMR G-EAU, BP 5095, 34196 Montpellier CEDEX 5, France

<sup>6</sup>. Department of Civil Engineering, University of Ottawa, Ottawa, ON, Canada

<sup>7</sup>. United Nations University, Institute for Water, Environment and Health, Hamilton, ON, Canada

<sup>8</sup>. Wetlands International, Bamako, Mali

<sup>9</sup>. Wetlands International, 6700 AL Wageningen, The Netherlands

<sup>10</sup>. Riverfutures, Cressbrook, Derbyshire, SK17 8SX, UK

\* Corresponding author, +1-610-758-5685; [yey217@lehigh.edu](mailto:yey217@lehigh.edu)

### **Contents of this file**

Table S1 to S3

### **Additional Supporting Information (Files uploaded separately)**

None

### **Introduction**

The supplement provide additional tables for the manuscript.

**Table S1 - List of Regional Climate Models and General Circulation Models used in the analysis**

| <b>Regional climate model</b> | <b>CANRCM4</b>                                     | <b>CCLM-4-8-17</b>                                | <b>HIRHAM5-v2</b>                                 | <b>RACMO22T</b>                            | <b>RACMO22T</b>                                   | <b>RCA4-v1</b>                                                   | <b>WRF331-v1</b>                                                 |
|-------------------------------|----------------------------------------------------|---------------------------------------------------|---------------------------------------------------|--------------------------------------------|---------------------------------------------------|------------------------------------------------------------------|------------------------------------------------------------------|
| <b>Institution (RCM)</b>      | Canadian Centre for Climate Modelling and Analysis | Climate Limited-area Modelling Community          | Danish Meteorological Institute                   | Royal Netherlands Meteorological Institute | Royal Netherlands Meteorological Institute        | Swedish Meteorological and Hydrological Institute, Rossby Centre | University Research and the Bjerknes Centre for Climate Research |
| <b>Driving GCM</b>            | <b>CanESM2</b>                                     | <b>ICHEC-EC-EARTH</b>                             | <b>ICHEC-EC-EARTH</b>                             | <b>MOHC-HadGEM2-ES</b>                     | <b>ICHEC-EC-EARTH</b>                             | <b>CCCma-CanESM2</b>                                             | <b>NCC-NorESM1-M</b>                                             |
| <b>Institution (GCM)</b>      | Canadian Centre for Climate Modelling and Analysis | Swedish Meteorological and Hydrological Institute | Swedish Meteorological and Hydrological Institute | UK Meteorological office                   | Swedish Meteorological and Hydrological Institute | Canadian Centre for Climate Modelling and Analysis               | Norwegian Climate Center                                         |

**Table S2 - Annual average irrigated crop production under different scenarios**

| Climate change |         | # of dams | Annual average irrigated crop production (ton/yr) |             |                 |                   |         |              |                    |          |                   |
|----------------|---------|-----------|---------------------------------------------------|-------------|-----------------|-------------------|---------|--------------|--------------------|----------|-------------------|
| Temp.          | Precip. |           | Guinea                                            | Mail        | Office du Niger | Inner Niger Delta | Niger   | Nigeria      | Outlet Niger Delta | Cameroon | Whole river basin |
| +0 °C          | +0%     | 6         | 1224421                                           | 4064<br>218 | 598734          | 1260597           | 2448950 | 264135<br>10 | 2569285            | 1077815  | 3522891<br>4      |
| +0 °C          | +0%     | 9         | 1224421                                           | 4126<br>168 | 598734          | 1285921           | 2450495 | 264164<br>26 | 2570996            | 1077815  | 3529532<br>4      |
| +0 °C          | +0%     | 10        | 1224415                                           | 4105<br>249 | 599252          | 1263499           | 2450495 | 264163<br>48 | 2571000            | 1077815  | 3527432<br>2      |
| +0 °C          | +15%    | 6         | 1190912                                           | 4090<br>554 | 600582          | 1285174           | 2593764 | 264972<br>16 | 2522200            | 1090731  | 3546317<br>6      |
| +0 °C          | +15%    | 9         | 1190912                                           | 4112<br>341 | 600582          | 1280627           | 2594769 | 264968<br>64 | 2521852            | 1090731  | 3548561<br>7      |
| +0 °C          | +15%    | 10        | 1190912                                           | 4113<br>648 | 600922          | 1281606           | 2594769 | 264968<br>64 | 2521852            | 1090731  | 3548692<br>5      |
| +0 °C          | +30%    | 6         | 1196519                                           | 4085<br>140 | 607064          | 1292520           | 2737325 | 265350<br>58 | 2479662            | 1097636  | 3565167<br>7      |
| +0 °C          | +30%    | 9         | 1196519                                           | 4099<br>817 | 607064          | 1291618           | 2737878 | 265350<br>58 | 2479662            | 1097636  | 3566690<br>8      |
| +0 °C          | +30%    | 10        | 1196519                                           | 4100<br>311 | 607078          | 1291824           | 2737878 | 265350<br>58 | 2479662            | 1097636  | 3566740<br>1      |
| +0 °C          | -15%    | 6         | 1255398                                           | 4084<br>216 | 651939          | 1304528           | 2308292 | 260741<br>98 | 2625890            | 1054336  | 3477643<br>8      |
| +0 °C          | -15%    | 9         | 1255398                                           | 4110<br>508 | 651939          | 1296020           | 2309858 | 260761<br>42 | 2626356            | 1054336  | 3480624<br>0      |
| +0 °C          | -15%    | 10        | 1255543                                           | 4115<br>649 | 653504          | 1297385           | 2309865 | 260762<br>97 | 2626361            | 1054336  | 3481168<br>9      |
| +0 °C          | -30%    | 6         | 1350518                                           | 3871<br>836 | 712077          | 1172851           | 2131262 | 254028<br>59 | 2685465            | 1017437  | 3377391<br>2      |
| +0 °C          | -30%    | 9         | 1350518                                           | 3879<br>724 | 712077          | 1170053           | 2132137 | 254032<br>94 | 2685465            | 1017437  | 3378311<br>0      |

|         |      |    |         |             |        |         |         |              |         |         |              |
|---------|------|----|---------|-------------|--------|---------|---------|--------------|---------|---------|--------------|
| +0 °C   | -30% | 10 | 1350742 | 3876<br>207 | 713437 | 1170834 | 2132127 | 254032<br>94 | 2685465 | 1017437 | 3377980<br>8 |
| +1.5 °C | +0%  | 6  | 1290705 | 3791<br>926 | 642595 | 1096066 | 2344013 | 256495<br>43 | 2466849 | 1066661 | 3414284<br>9 |
| +1.5 °C | +0%  | 9  | 1290705 | 3806<br>436 | 642595 | 1088612 | 2345427 | 256518<br>82 | 2467813 | 1066661 | 3416111<br>2 |
| +1.5 °C | +0%  | 10 | 1290772 | 3806<br>841 | 642661 | 1089272 | 2345429 | 256517<br>87 | 2467813 | 1066661 | 3416148<br>9 |
| +1.5 °C | +15% | 6  | 1284803 | 3836<br>317 | 625476 | 1164381 | 2499095 | 257247<br>99 | 2416413 | 1079210 | 3442422<br>5 |
| +1.5 °C | +15% | 9  | 1284803 | 3845<br>376 | 625476 | 1157782 | 2499920 | 257242<br>41 | 2415825 | 1079210 | 3443355<br>0 |
| +1.5 °C | +15% | 10 | 1284803 | 3846<br>358 | 625746 | 1158317 | 2499920 | 257242<br>41 | 2415825 | 1079210 | 3443453<br>2 |
| +1.5 °C | +30% | 6  | 1281251 | 3815<br>254 | 632455 | 1160353 | 2658215 | 257219<br>39 | 2370243 | 1088592 | 3456525<br>1 |
| +1.5 °C | +30% | 9  | 1281251 | 3824<br>105 | 632455 | 1158469 | 2658738 | 257219<br>39 | 2370243 | 1088592 | 3457462<br>4 |
| +1.5 °C | +30% | 10 | 1281251 | 3825<br>061 | 632605 | 1159018 | 2658738 | 257219<br>39 | 2370243 | 1088592 | 3457558<br>1 |
| +1.5 °C | -15% | 6  | 1354383 | 3707<br>598 | 653813 | 1059125 | 2182217 | 253050<br>79 | 2529782 | 1038640 | 3358791<br>6 |
| +1.5 °C | -15% | 9  | 1354383 | 3717<br>022 | 653813 | 1054334 | 2183259 | 253068<br>75 | 2529835 | 1038640 | 3360017<br>9 |
| +1.5 °C | -15% | 10 | 1354585 | 3719<br>051 | 654779 | 1054174 | 2183249 | 253068<br>77 | 2529782 | 1038640 | 3360240<br>2 |
| +1.5 °C | -30% | 6  | 1445915 | 3470<br>244 | 630237 | 965310  | 1995865 | 245765<br>97 | 2591234 | 995707  | 3248432<br>8 |
| +1.5 °C | -30% | 9  | 1445915 | 3473<br>329 | 630237 | 963402  | 1996416 | 245768<br>73 | 2591234 | 995707  | 3248823<br>9 |
| +1.5 °C | -30% | 10 | 1446303 | 3472<br>795 | 630750 | 963167  | 1996413 | 245768<br>64 | 2591234 | 995707  | 3248808<br>3 |

|            |      |    |         |             |        |        |         |              |         |         |              |
|------------|------|----|---------|-------------|--------|--------|---------|--------------|---------|---------|--------------|
| +3 °C      | +0%  | 6  | 1339674 | 3361<br>861 | 571316 | 866299 | 2199966 | 248327<br>52 | 2364462 | 1052442 | 3278669<br>4 |
| +3 °C      | +0%  | 9  | 1339674 | 3376<br>966 | 571316 | 870735 | 2201046 | 248360<br>66 | 2365712 | 1052442 | 3280619<br>3 |
| +3 °C      | +0%  | 10 | 1339836 | 3377<br>966 | 572016 | 870947 | 2201046 | 248359<br>82 | 2365765 | 1052442 | 3280727<br>3 |
| +3 °C      | +15% | 6  | 1288360 | 3408<br>552 | 579524 | 906620 | 2363898 | 249007<br>86 | 2316682 | 1065295 | 3302689<br>2 |
| +3 °C      | +15% | 9  | 1288360 | 3422<br>235 | 579524 | 912169 | 2364579 | 248998<br>98 | 2315833 | 1065295 | 3304036<br>8 |
| +3 °C      | +15% | 10 | 1288360 | 3423<br>187 | 579992 | 912543 | 2364579 | 248998<br>98 | 2315833 | 1065295 | 3304132<br>0 |
| +3 °C      | +30% | 6  | 1296134 | 3410<br>311 | 562508 | 952591 | 2537251 | 249109<br>46 | 2266696 | 1074897 | 3322953<br>9 |
| +3 °C      | +30% | 9  | 1296134 | 3415<br>257 | 562508 | 951194 | 2537679 | 249109<br>37 | 2266687 | 1074897 | 3323490<br>4 |
| +3 °C      | +30% | 10 | 1296134 | 3416<br>001 | 562590 | 951849 | 2537679 | 249109<br>37 | 2266687 | 1074897 | 3323564<br>8 |
| +3 °C      | -15% | 6  | 1358034 | 3281<br>583 | 581242 | 823314 | 2061344 | 244861<br>29 | 2439302 | 1023442 | 3221053<br>3 |
| +3 °C      | -15% | 9  | 1358034 | 3285<br>616 | 581242 | 821549 | 2062049 | 244865<br>65 | 2438651 | 1023442 | 3221570<br>6 |
| +3 °C      | -15% | 10 | 1358243 | 3286<br>308 | 581433 | 821956 | 2061987 | 244872<br>11 | 2439297 | 1023442 | 3221719<br>1 |
| +3 °C      | -30% | 6  | 1421895 | 3092<br>834 | 584885 | 735596 | 1889140 | 237510<br>32 | 2505655 | 969713  | 3112461<br>3 |
| +3 °C      | -30% | 9  | 1421895 | 3093<br>976 | 584885 | 734629 | 1889569 | 237469<br>47 | 2505652 | 969713  | 3112210<br>0 |
| +3 °C      | -30% | 10 | 1422568 | 3093<br>637 | 585437 | 733719 | 1889568 | 237460<br>39 | 2505652 | 969713  | 3112152<br>5 |
| +4.5<br>°C | +0%  | 6  | 1247051 | 2949<br>622 | 474724 | 656317 | 2080366 | 239912<br>11 | 2256078 | 1034796 | 3130304<br>6 |

|            |      |    |         |             |        |        |         |              |         |         |              |
|------------|------|----|---------|-------------|--------|--------|---------|--------------|---------|---------|--------------|
| +4.5<br>°C | +0%  | 9  | 1247051 | 2954<br>842 | 474724 | 654913 | 2081223 | 239935<br>53 | 2256703 | 1034796 | 3131146<br>5 |
| +4.5<br>°C | +0%  | 10 | 1247199 | 2955<br>809 | 474951 | 655280 | 2081223 | 239936<br>31 | 2256752 | 1034796 | 3131265<br>8 |
| +4.5<br>°C | +15% | 6  | 1238199 | 3001<br>063 | 482990 | 706867 | 2235725 | 240714<br>26 | 2208441 | 1050414 | 3159682<br>7 |
| +4.5<br>°C | +15% | 9  | 1238199 | 3005<br>392 | 482990 | 705610 | 2236305 | 240716<br>02 | 2208587 | 1050414 | 3160191<br>2 |
| +4.5<br>°C | +15% | 10 | 1238199 | 3006<br>106 | 483198 | 705881 | 2236305 | 240716<br>02 | 2208587 | 1050414 | 3160262<br>6 |
| +4.5<br>°C | +30% | 6  | 1246786 | 3036<br>755 | 488427 | 752003 | 2394637 | 240892<br>80 | 2166682 | 1060248 | 3182770<br>5 |
| +4.5<br>°C | +30% | 9  | 1246786 | 3040<br>873 | 488427 | 751374 | 2395012 | 240889<br>19 | 2166261 | 1060248 | 3183183<br>7 |
| +4.5<br>°C | +30% | 10 | 1246786 | 3041<br>087 | 488496 | 751524 | 2395012 | 240889<br>19 | 2166261 | 1060248 | 3183205<br>1 |
| +4.5<br>°C | -15% | 6  | 1253419 | 2838<br>690 | 462762 | 598744 | 1951445 | 236778<br>13 | 2339047 | 1001575 | 3072294<br>1 |
| +4.5<br>°C | -15% | 9  | 1253419 | 2841<br>932 | 462762 | 598279 | 1951874 | 236783<br>46 | 2338585 | 1001575 | 3072714<br>5 |
| +4.5<br>°C | -15% | 10 | 1253681 | 2842<br>555 | 463012 | 598608 | 1951861 | 236781<br>67 | 2338585 | 1001575 | 3072784<br>0 |
| +4.5<br>°C | -30% | 6  | 1240992 | 2636<br>743 | 445183 | 517041 | 1798789 | 229736<br>24 | 2408915 | 939739  | 2958988<br>7 |
| +4.5<br>°C | -30% | 9  | 1240992 | 2637<br>780 | 445183 | 516759 | 1799153 | 229661<br>29 | 2408915 | 939739  | 2958379<br>3 |
| +4.5<br>°C | -30% | 10 | 1241394 | 2638<br>282 | 445490 | 516814 | 1799127 | 229661<br>29 | 2408915 | 939739  | 2958467<br>2 |

**Table S3 - Annual average hydropower generation under different scenarios**

| Climate change |         | # of dams | Annual average hydropower generation (GWh/yr) |       |                 |                   |       |         |                    |          |                   |
|----------------|---------|-----------|-----------------------------------------------|-------|-----------------|-------------------|-------|---------|--------------------|----------|-------------------|
| Temp.          | Precip. |           | Guinea                                        | Mail  | Office du Niger | Inner Niger Delta | Niger | Nigeria | Outlet Niger Delta | Cameroon | Whole river basin |
| +0 °C          | +0%     | 6         | N/A                                           | 426   | N/A             | N/A               | N/A   | 112614  | N/A                | 5430     | 118469            |
| +0 °C          | +0%     | 9         | N/A                                           | 29440 | N/A             | N/A               | 13941 | 112456  | N/A                | 5430     | 161267            |
| +0 °C          | +0%     | 10        | 53996                                         | 29443 | N/A             | N/A               | 13941 | 112577  | N/A                | 5430     | 215386            |
| +0 °C          | +15%    | 6         | N/A                                           | 437   | N/A             | N/A               | N/A   | 137542  | N/A                | 8819     | 146799            |
| +0 °C          | +15%    | 9         | N/A                                           | 29614 | N/A             | N/A               | 14025 | 142036  | N/A                | 8819     | 194495            |
| +0 °C          | +15%    | 10        | 53996                                         | 29618 | N/A             | N/A               | 14025 | 142036  | N/A                | 8819     | 248494            |
| +0 °C          | +30%    | 6         | N/A                                           | 447   | N/A             | N/A               | N/A   | 145764  | N/A                | 12038    | 158249            |
| +0 °C          | +30%    | 9         | N/A                                           | 29668 | N/A             | N/A               | 14025 | 147031  | N/A                | 12038    | 202762            |
| +0 °C          | +30%    | 10        | 53996                                         | 29673 | N/A             | N/A               | 14025 | 147031  | N/A                | 12038    | 256763            |
| +0 °C          | -15%    | 6         | N/A                                           | 414   | N/A             | N/A               | N/A   | 98868   | N/A                | 3174     | 102457            |
| +0 °C          | -15%    | 9         | N/A                                           | 26677 | N/A             | N/A               | 10820 | 92028   | N/A                | 3174     | 132699            |
| +0 °C          | -15%    | 10        | 53992                                         | 26718 | N/A             | N/A               | 10857 | 92442   | N/A                | 3174     | 187184            |
| +0 °C          | -30%    | 6         | N/A                                           | 402   | N/A             | N/A               | N/A   | 76730   | N/A                | 1828     | 78960             |
| +0 °C          | -30%    | 9         | N/A                                           | 16564 | N/A             | N/A               | 4688  | 70278   | N/A                | 1828     | 93358             |
| +0 °C          | -30%    | 10        | 28131                                         | 16864 | N/A             | N/A               | 4637  | 70412   | N/A                | 1828     | 121872            |
| +1.5 °C        | +0%     | 6         | N/A                                           | 423   | N/A             | N/A               | N/A   | 110453  | N/A                | 5127     | 116003            |
| +1.5 °C        | +0%     | 9         | N/A                                           | 29274 | N/A             | N/A               | 13763 | 108866  | N/A                | 5127     | 157031            |
| +1.5 °C        | +0%     | 10        | 53996                                         | 29278 | N/A             | N/A               | 13770 | 109114  | N/A                | 5127     | 211285            |
| +1.5 °C        | +15%    | 6         | N/A                                           | 435   | N/A             | N/A               | N/A   | 136242  | N/A                | 8457     | 145134            |
| +1.5 °C        | +15%    | 9         | N/A                                           | 29599 | N/A             | N/A               | 14025 | 140444  | N/A                | 8457     | 192525            |
| +1.5 °C        | +15%    | 10        | 53996                                         | 29602 | N/A             | N/A               | 14025 | 140444  | N/A                | 8457     | 246523            |
| +1.5 °C        | +30%    | 6         | N/A                                           | 445   | N/A             | N/A               | N/A   | 143950  | N/A                | 11633    | 156029            |
| +1.5 °C        | +30%    | 9         | N/A                                           | 29662 | N/A             | N/A               | 14025 | 145484  | N/A                | 11633    | 200804            |
| +1.5 °C        | +30%    | 10        | 53996                                         | 29666 | N/A             | N/A               | 14025 | 145484  | N/A                | 11633    | 254804            |
| +1.5 °C        | -15%    | 6         | N/A                                           | 413   | N/A             | N/A               | N/A   | 96649   | N/A                | 3059     | 100121            |
| +1.5 °C        | -15%    | 9         | N/A                                           | 25887 | N/A             | N/A               | 10179 | 88570   | N/A                | 3059     | 127695            |

|         |      |    |       |       |     |     |       |        |     |       |        |
|---------|------|----|-------|-------|-----|-----|-------|--------|-----|-------|--------|
| +1.5 °C | -15% | 10 | 53972 | 25978 | N/A | N/A | 10207 | 88736  | N/A | 3059  | 181953 |
| +1.5 °C | -30% | 6  | N/A   | 401   | N/A | N/A | N/A   | 74581  | N/A | 1779  | 76760  |
| +1.5 °C | -30% | 9  | N/A   | 15377 | N/A | N/A | 4254  | 68261  | N/A | 1779  | 89671  |
| +1.5 °C | -30% | 10 | 24906 | 15576 | N/A | N/A | 4170  | 68317  | N/A | 1779  | 114749 |
| +3 °C   | +0%  | 6  | N/A   | 422   | N/A | N/A | N/A   | 108387 | N/A | 4912  | 113721 |
| +3 °C   | +0%  | 9  | N/A   | 29137 | N/A | N/A | 13614 | 105531 | N/A | 4912  | 153194 |
| +3 °C   | +0%  | 10 | 53996 | 29117 | N/A | N/A | 13604 | 105702 | N/A | 4912  | 207331 |
| +3 °C   | +15% | 6  | N/A   | 433   | N/A | N/A | N/A   | 134837 | N/A | 8172  | 143442 |
| +3 °C   | +15% | 9  | N/A   | 29588 | N/A | N/A | 14025 | 138530 | N/A | 8172  | 190315 |
| +3 °C   | +15% | 10 | 53996 | 29590 | N/A | N/A | 14025 | 138530 | N/A | 8172  | 244313 |
| +3 °C   | +30% | 6  | N/A   | 443   | N/A | N/A | N/A   | 142743 | N/A | 11304 | 154490 |
| +3 °C   | +30% | 9  | N/A   | 29653 | N/A | N/A | 14025 | 143878 | N/A | 11304 | 198860 |
| +3 °C   | +30% | 10 | 53996 | 29657 | N/A | N/A | 14025 | 143878 | N/A | 11304 | 252859 |
| +3 °C   | -15% | 6  | N/A   | 411   | N/A | N/A | N/A   | 94524  | N/A | 2962  | 97897  |
| +3 °C   | -15% | 9  | N/A   | 25306 | N/A | N/A | 9373  | 85556  | N/A | 2962  | 123197 |
| +3 °C   | -15% | 10 | 53482 | 25298 | N/A | N/A | 9394  | 85813  | N/A | 2962  | 176949 |
| +3 °C   | -30% | 6  | N/A   | 400   | N/A | N/A | N/A   | 72335  | N/A | 1739  | 74473  |
| +3 °C   | -30% | 9  | N/A   | 14049 | N/A | N/A | 3899  | 64226  | N/A | 1739  | 83913  |
| +3 °C   | -30% | 10 | 23917 | 14131 | N/A | N/A | 3813  | 64229  | N/A | 1739  | 107829 |
| +4.5 °C | +0%  | 6  | N/A   | 420   | N/A | N/A | N/A   | 106482 | N/A | 4707  | 111609 |
| +4.5 °C | +0%  | 9  | N/A   | 28961 | N/A | N/A | 13239 | 102059 | N/A | 4707  | 148967 |
| +4.5 °C | +0%  | 10 | 53996 | 28937 | N/A | N/A | 13301 | 102324 | N/A | 4707  | 203266 |
| +4.5 °C | +15% | 6  | N/A   | 431   | N/A | N/A | N/A   | 133086 | N/A | 7874  | 141392 |
| +4.5 °C | +15% | 9  | N/A   | 29576 | N/A | N/A | 14025 | 136719 | N/A | 7874  | 188195 |
| +4.5 °C | +15% | 10 | 53996 | 29578 | N/A | N/A | 14025 | 136749 | N/A | 7874  | 242223 |
| +4.5 °C | +30% | 6  | N/A   | 441   | N/A | N/A | N/A   | 141471 | N/A | 10971 | 152884 |
| +4.5 °C | +30% | 9  | N/A   | 29645 | N/A | N/A | 14025 | 142268 | N/A | 10971 | 196910 |
| +4.5 °C | +30% | 10 | 53996 | 29649 | N/A | N/A | 14025 | 142268 | N/A | 10971 | 250909 |
| +4.5 °C | -15% | 6  | N/A   | 410   | N/A | N/A | N/A   | 92378  | N/A | 2873  | 95660  |
| +4.5 °C | -15% | 9  | N/A   | 24787 | N/A | N/A | 8651  | 82984  | N/A | 2873  | 119294 |
| +4.5 °C | -15% | 10 | 53128 | 24816 | N/A | N/A | 8621  | 83087  | N/A | 2873  | 172525 |
| +4.5 °C | -30% | 6  | N/A   | 399   | N/A | N/A | N/A   | 69570  | N/A | 1709  | 71677  |



|         |      |    |       |       |     |     |      |       |     |      |        |
|---------|------|----|-------|-------|-----|-----|------|-------|-----|------|--------|
| +4.5 °C | -30% | 9  | N/A   | 13111 | N/A | N/A | 3627 | 60125 | N/A | 1709 | 78572  |
| +4.5 °C | -30% | 10 | 23173 | 13062 | N/A | N/A | 3546 | 60170 | N/A | 1709 | 101659 |
